# Supplementary material for: The Local Edge Machine: inference of dynamic models of gene regulation
Source: PubMed Central journal article supplement (PMC5072315; doi:10.1186/s13059-016-1076-z), 2016-10-19

**AUC of LEM: 1.0000**

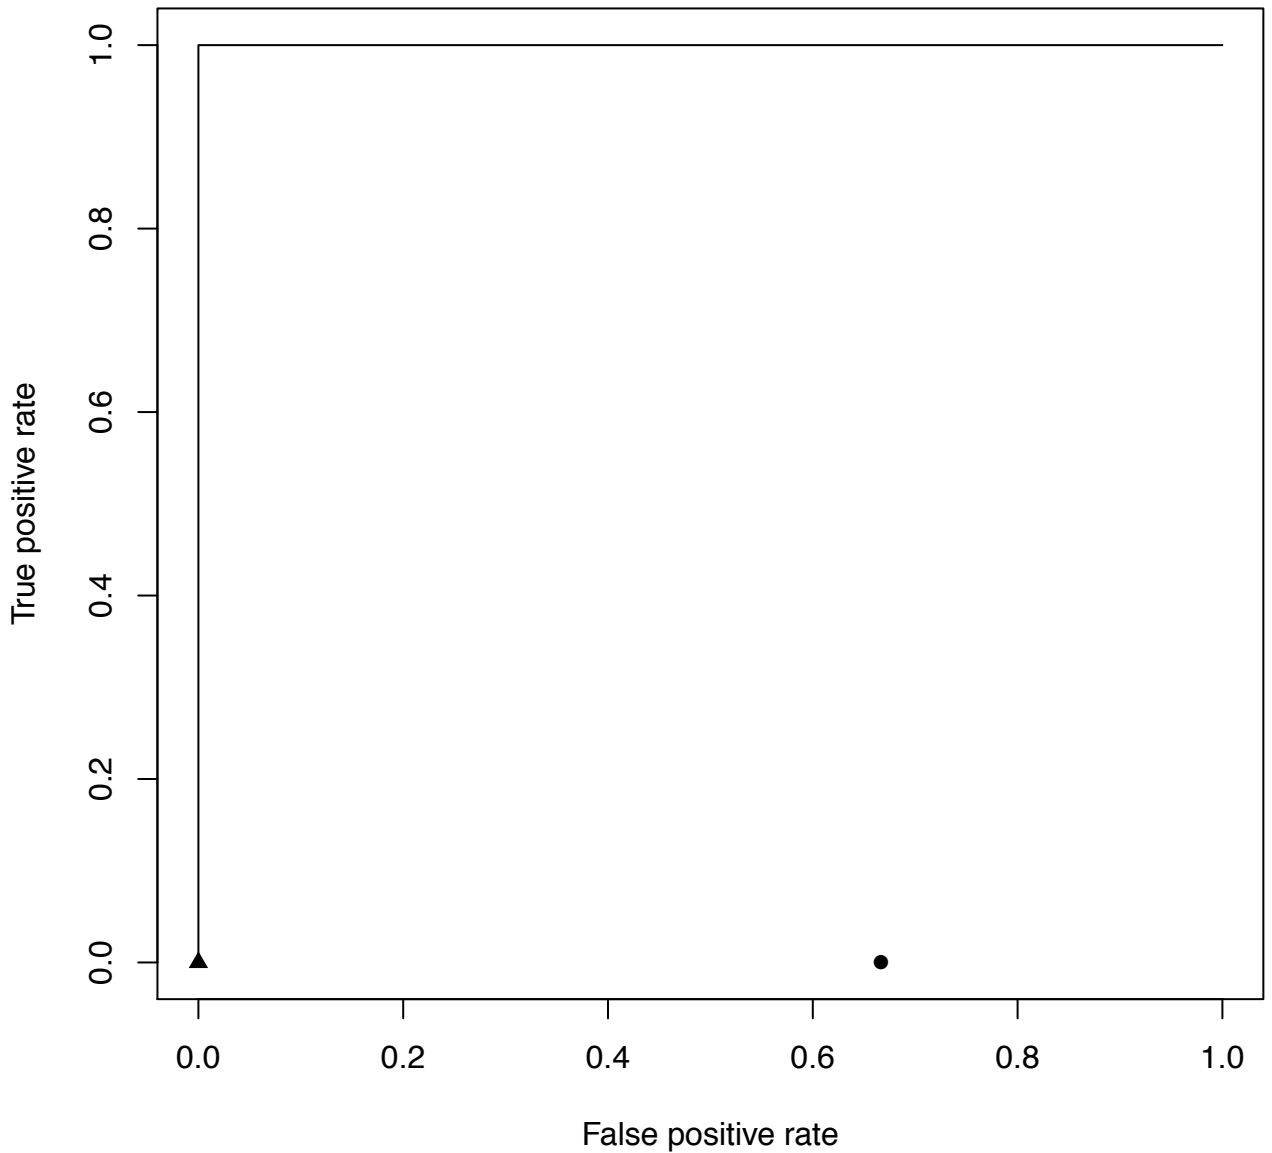

**AUC of LEM: 1.0000**



**AUC of LEM: 0.9900**

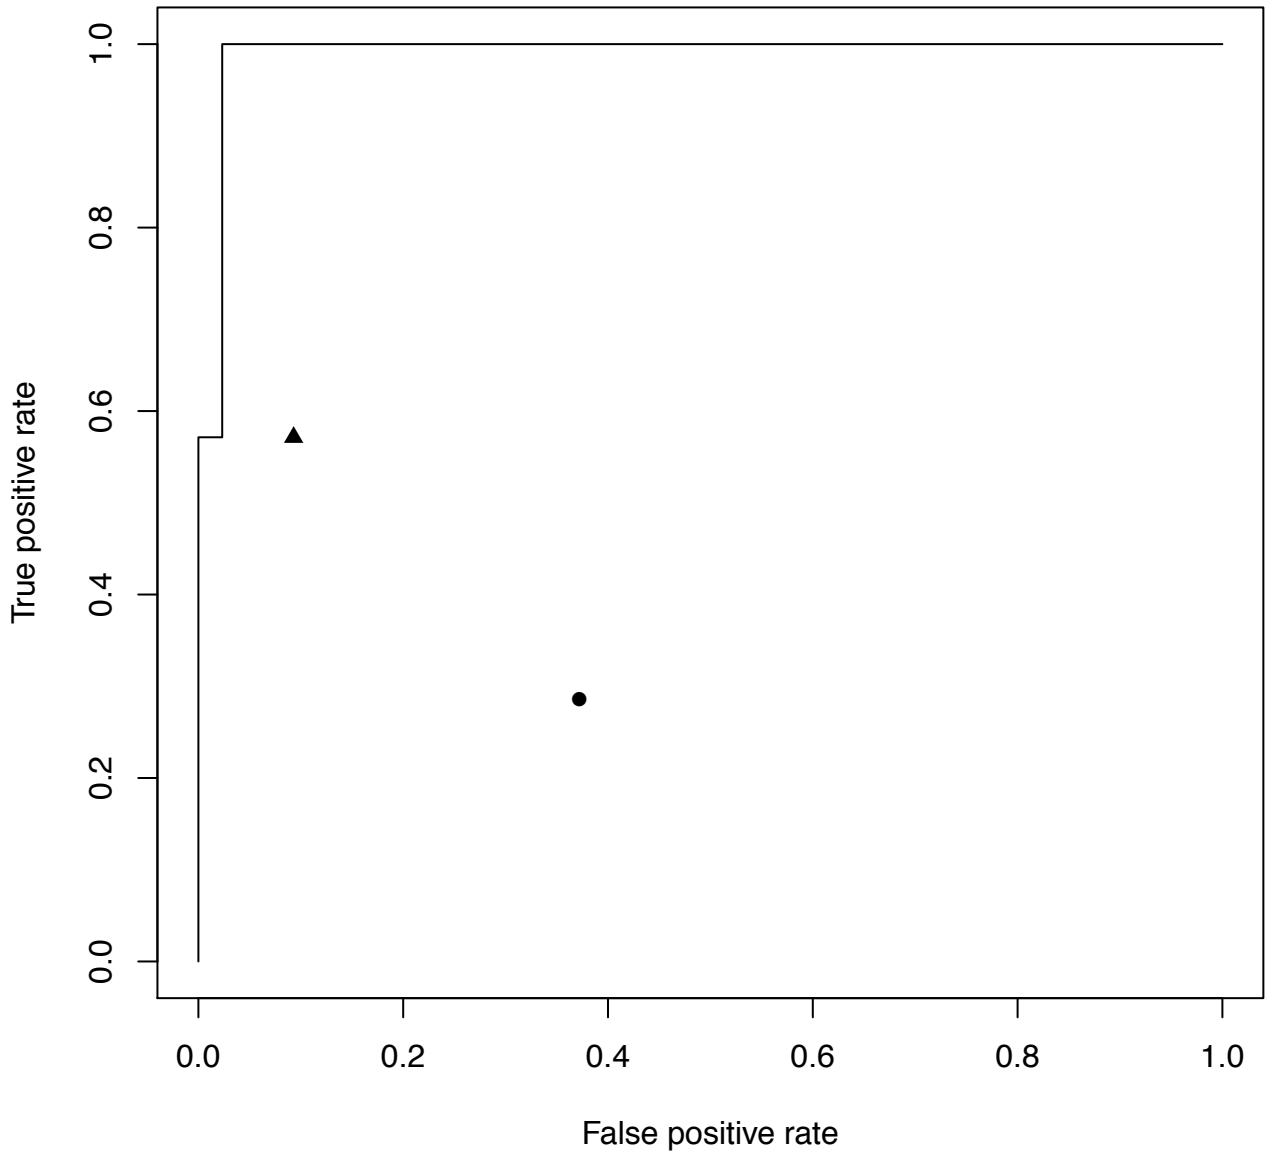

**AUC of LEM: 0.8884**

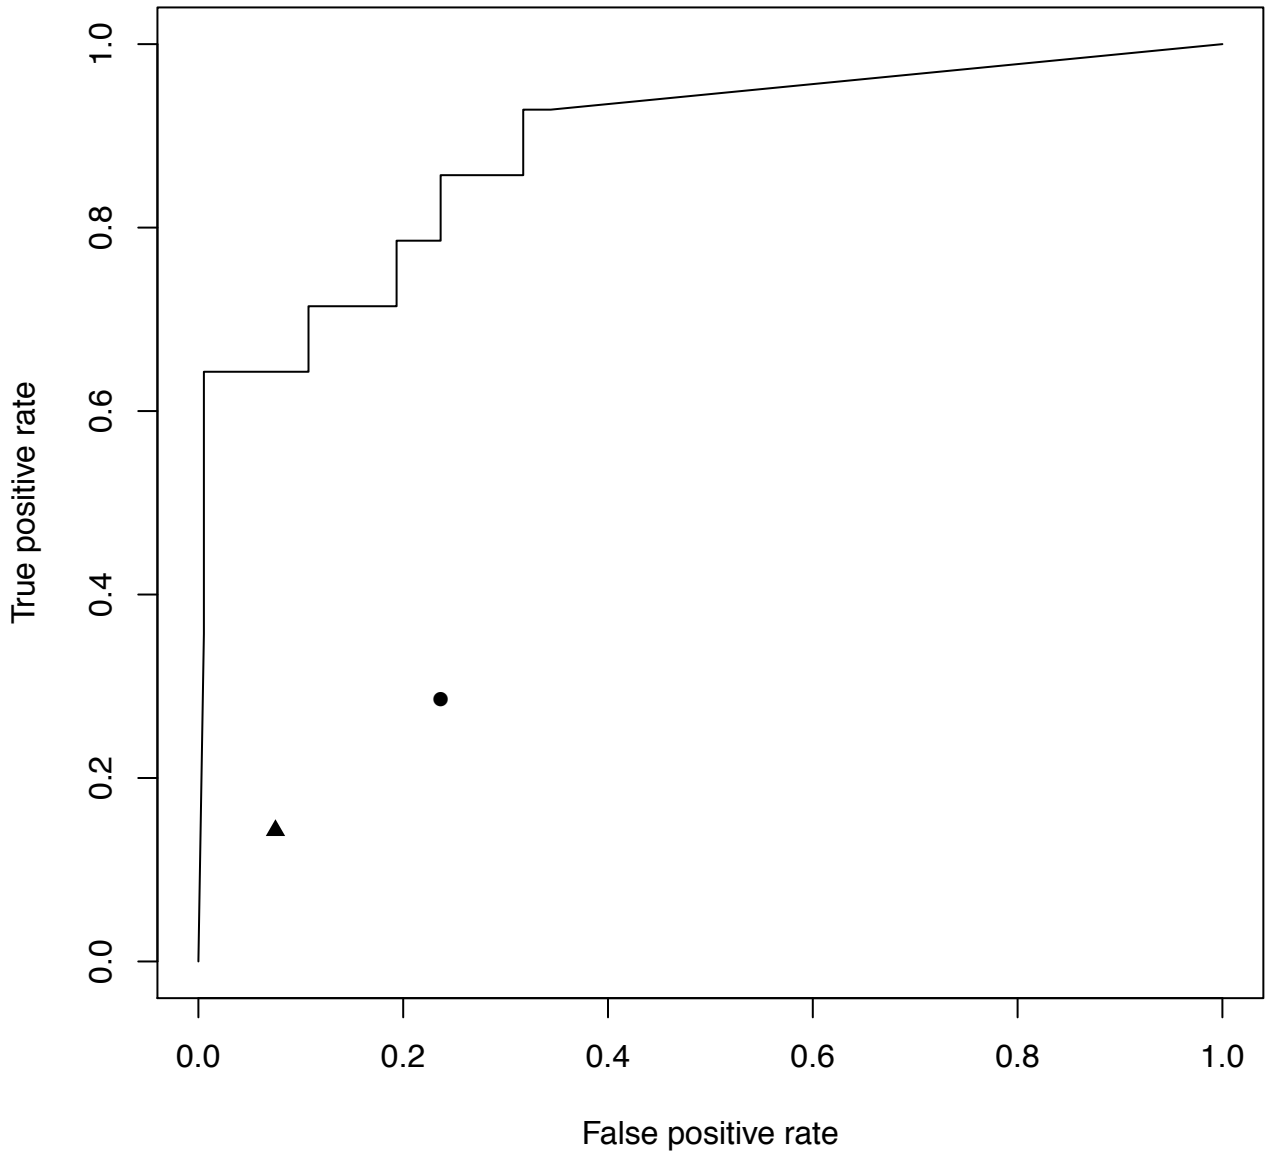

**AUC of LEM: 0.8781**

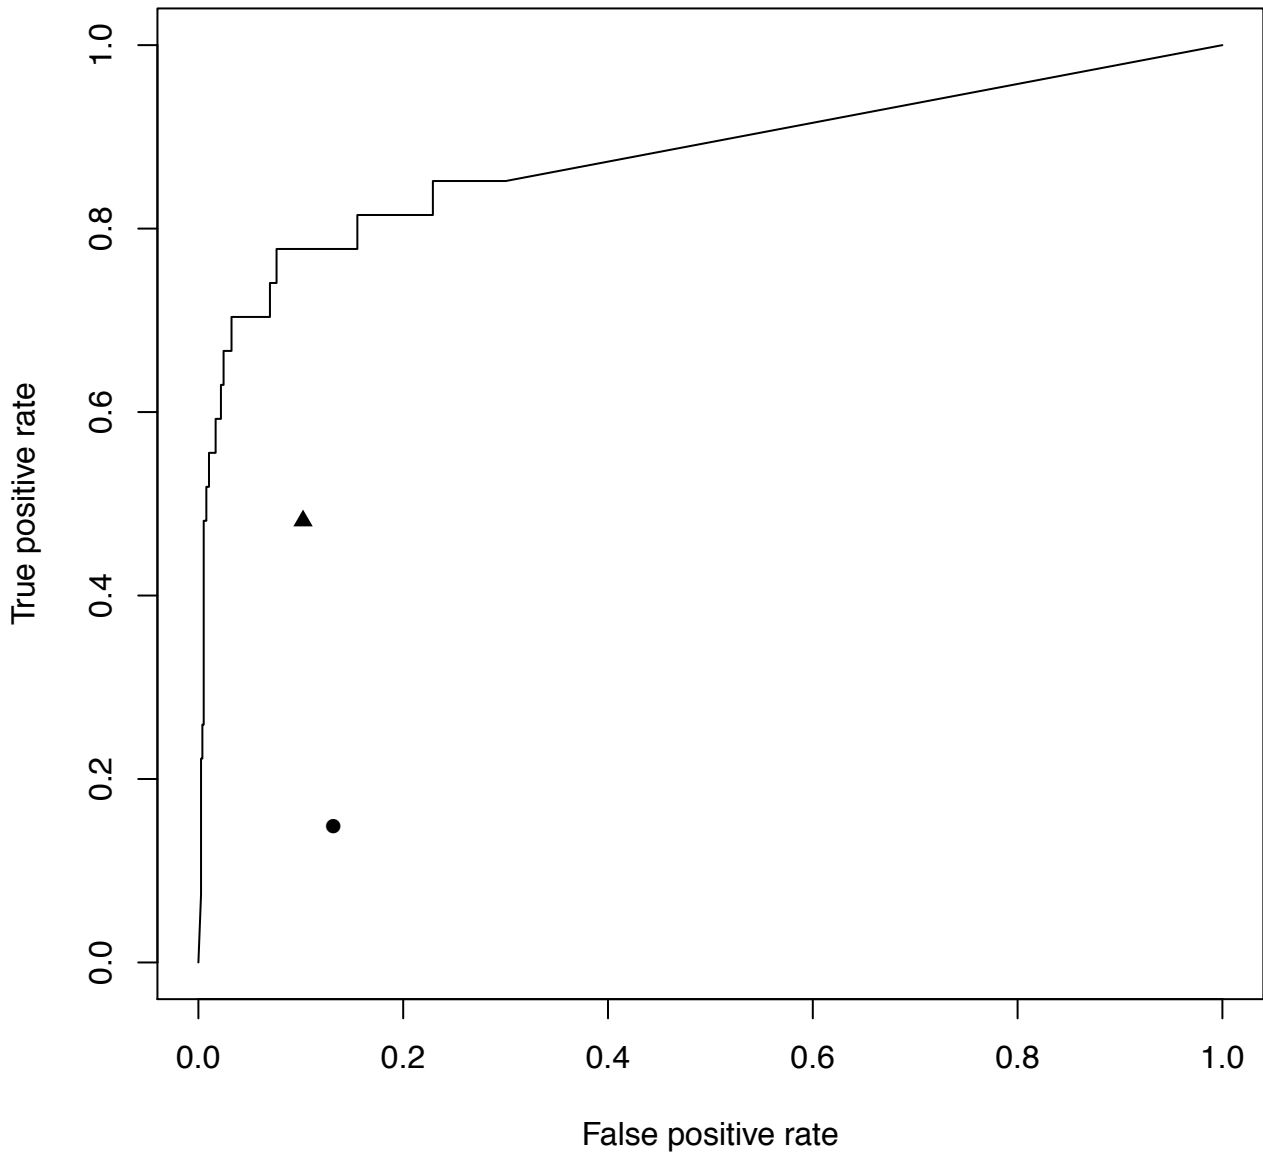

**AUC of LEM: 0.8693**

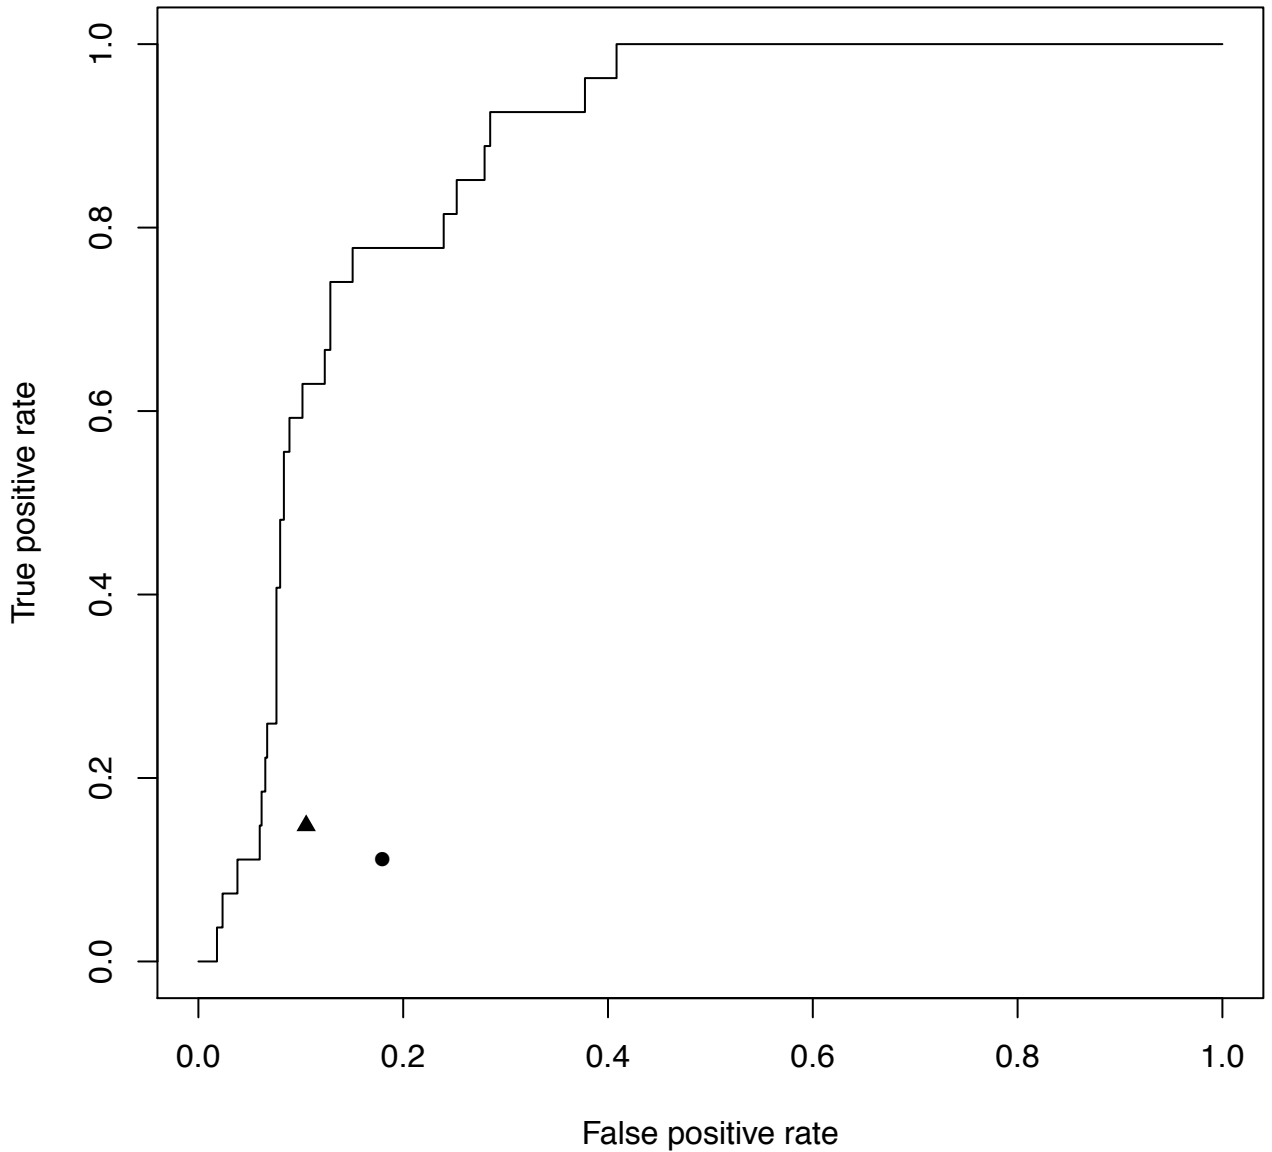

Supplement: 13059_2016_1076_MOESM4_ESM.pdf [file 13059_2016_1076_MOESM4_ESM.pdf]
