# Supplementary material for: The Local Edge Machine: inference of dynamic models of gene regulation
Source: PubMed Central journal article supplement (PMC5072315; doi:10.1186/s13059-016-1076-z), 2016-10-19
Supplement: 13059_2016_1076_MOESM5_ESM.pdf [file 13059_2016_1076_MOESM5_ESM.pdf]

| Network (dataset)                | # Nodes | LEM (AUC) | Inferelator (AUC) | Granger Causality (AUC) | Hill-DBN (AUC) | Jump3 (AUC) |
|----------------------------------|---------|-----------|-------------------|-------------------------|----------------|-------------|
| In silico 1                      | 3       | 1.0000    | 0.9000            | 0.7000                  | 0.5000         | 0.9000      |
| In silico 2                      | 3       | 1.0000    | 0.5667            | 0.8111                  | 0.3667         | 0.7222      |
| In silico 6                      | 3       | 1.0000    | 0.8111            | 0.8556                  | 0.5000         | 0.7667      |
| In silico 7                      | 3       | 1.0000    | 0.8556            | 0.7444                  | 0.2778         | 0.8556      |
| In silico 3                      | 5       | 0.9900    | 0.7857            | 0.7791                  | 0.4003         | 0.6794      |
| In silico 8                      | 5       | 0.9867    | 0.6395            | 0.8787                  | 0.4003         | 0.8588      |
| In silico 9                      | 5       | 1.0000    | 0.6689            | 0.6600                  | 0.4022         | 0.6067      |
| In silico 10                     | 5       | 1.0000    | 0.9444            | 0.7844                  | 0.7222         | 0.6867      |
| In silico 4                      | 10      | 0.8884    | 0.5541            | 0.5949                  | 0.5131         | 0.7727      |
| In silico 11                     | 10      | 0.9100    | 0.6977            | 0.6771                  | 0.6829         | 0.7954      |
| In silico 12                     | 10      | 0.9064    | 0.6392            | 0.7491                  | 0.6007         | 0.7350      |
| In silico 13                     | 10      | 0.8837    | 0.6615            | 0.6737                  | 0.5433         | 0.7002      |
| In silico 14                     | 10      | 0.9181    | 0.6654            | 0.6569                  | 0.5068         | 0.8207      |
| In silico 15                     | 10      | 0.9237    | 0.7276            | 0.7255                  | 0.6515         | 0.7745      |
| In silico 16                     | 10      | 1.0000    | 0.6553            | 0.7568                  | 0.6942         | 0.8400      |
| In silico 17                     | 10      | 1.0000    | 0.8579            | 0.7368                  | 0.7611         | 0.9568      |
| In silico 18                     | 10      | 0.9184    | 0.7105            | 0.6723                  | 0.6479         | 0.7800      |
| In silico 19                     | 10      | 0.8825    | 0.6628            | 0.6402                  | 0.5369         | 0.7680      |
| In silico 5                      | 20      | 0.8781    | 0.6789            | 0.7441                  | 0.6770         | 0.7540      |
| In silico 20                     | 20      | 0.9037    | 0.7718            | 0.8235                  | 0.6758         | 0.7839      |
| In silico 21                     | 20      | 0.8233    | 0.6388            | 0.6429                  | 0.5129         | 0.6584      |
| In silico 22                     | 20      | 0.8157    | 0.6927            | 0.6933                  | 0.6376         | 0.7174      |
| Yeast cell-cycle 1 (replicate 1) | 17      | 0.8693    | 0.6705            | 0.6893                  | 0.6253         | 0.6481      |
| Yeast cell-cycle 1 (replicate 2) | 17      | 0.8465    | 0.6592            | 0.6766                  | 0.5239         | 0.5483      |
| Yeast cell-cycle 2 (replicate 1) | 8       | 0.8460    | 0.6551            | 0.6032                  | 0.5056         | 0.6099      |
| Yeast cell-cycle 2 (replicate 2) | 8       | 0.8404    | 0.6680            | 0.6300                  | 0.5446         | 0.5424      |
| Yeast cell-cycle 3 (replicate 1) | 10      | 0.7092    | 0.6064            | 0.6224                  | 0.5077         | 0.6317      |
| Yeast cell-cycle 3 (replicate 2) | 10      | 0.6957    | 0.6365            | 0.6022                  | 0.6407         | 0.5104      |
| Yeast cell-cycle 4 (replicate 1) | 19      | 0.7409    | 0.5790            | 0.6333                  | 0.5588         | 0.6284      |
| Yeast cell-cycle 4 (replicate 2) | 19      | 0.7208    | 0.6269            | 0.6319                  | 0.5476         | 0.5266      |
| Yeast cell-cycle 5 (replicate 1) | 28      | 0.5138    | 0.5056            | 0.5407                  | 0.4432         | 0.5231      |
| Yeast cell-cycle 5 (replicate 2) | 28      | 0.4804    | 0.5410            | 0.5836                  | 0.4720         | 0.5243      |

| Network (dataset)                | # Nodes | LEM (AUPR) | Inferelator (AUPR) | Granger Causality (AUPR) | Hill-DBN (AUPR) | Jump3 (AUPR) |
|----------------------------------|---------|------------|--------------------|--------------------------|-----------------|--------------|
| In silico 1                      | 3       | 0.5000     | 0.4167             | 0.2139                   | 0.1500          | 0.4167       |
| In silico 2                      | 3       | 0.8333     | 0.1986             | 0.3417                   | 0.1236          | 0.2444       |
| In silico 6                      | 3       | 0.5000     | 0.3417             | 0.3681                   | 0.1500          | 0.2722       |
| In silico 7                      | 3       | 0.5000     | 0.3681             | 0.2306                   | 0.1097          | 0.3681       |
| In silico 3                      | 5       | 0.8611     | 0.3924             | 0.2841                   | 0.1161          | 0.2092       |
| In silico 8                      | 5       | 0.7184     | 0.2030             | 0.4164                   | 0.1151          | 0.3782       |
| In silico 9                      | 5       | 0.8000     | 0.2381             | 0.1379                   | 0.0774          | 0.1210       |
| In silico 10                     | 5       | 0.7000     | 0.4500             | 0.1833                   | 0.1522          | 0.1382       |
| In silico 4                      | 10      | 0.4729     | 0.0866             | 0.0933                   | 0.0782          | 0.1899       |
| In silico 11                     | 10      | 0.5187     | 0.2036             | 0.1481                   | 0.1386          | 0.2662       |
| In silico 12                     | 10      | 0.6291     | 0.1687             | 0.2501                   | 0.1131          | 0.2599       |
| In silico 13                     | 10      | 0.4651     | 0.1917             | 0.1468                   | 0.0984          | 0.1562       |
| In silico 14                     | 10      | 0.5295     | 0.2110             | 0.1327                   | 0.0881          | 0.2987       |
| In silico 15                     | 10      | 0.5239     | 0.2141             | 0.1663                   | 0.1191          | 0.2378       |
| In silico 16                     | 10      | 0.7500     | 0.1370             | 0.1392                   | 0.1018          | 0.1686       |
| In silico 17                     | 10      | 0.7500     | 0.2116             | 0.1193                   | 0.1211          | 0.4306       |
| In silico 18                     | 10      | 0.5727     | 0.2355             | 0.1820                   | 0.1357          | 0.2681       |
| In silico 19                     | 10      | 0.3506     | 0.1373             | 0.1180                   | 0.1227          | 0.2017       |
| In silico 5                      | 20      | 0.4577     | 0.0768             | 0.0719                   | 0.0742          | 0.0851       |
| In silico 20                     | 20      | 0.6261     | 0.1800             | 0.1368                   | 0.1014          | 0.1306       |
| In silico 21                     | 20      | 0.4665     | 0.1186             | 0.0817                   | 0.0618          | 0.0658       |
| In silico 22                     | 20      | 0.3022     | 0.0922             | 0.0733                   | 0.0951          | 0.0961       |
| Yeast cell-cycle 1 (replicate 1) | 17      | 0.1630     | 0.0977             | 0.0877                   | 0.0673          | 0.0857       |
| Yeast cell-cycle 1 (replicate 2) | 17      | 0.1352     | 0.0758             | 0.0737                   | 0.0489          | 0.0646       |
| Yeast cell-cycle 2 (replicate 1) | 8       | 0.3219     | 0.1971             | 0.1764                   | 0.1655          | 0.2488       |
| Yeast cell-cycle 2 (replicate 2) | 8       | 0.3314     | 0.2268             | 0.2106                   | 0.1812          | 0.1343       |
| Yeast cell-cycle 3 (replicate 1) | 10      | 0.2046     | 0.1611             | 0.1782                   | 0.1345          | 0.2077       |
| Yeast cell-cycle 3 (replicate 2) | 10      | 0.2001     | 0.2150             | 0.2060                   | 0.2024          | 0.1434       |
| Yeast cell-cycle 4 (replicate 1) | 19      | 0.1036     | 0.0680             | 0.0879                   | 0.0608          | 0.0865       |
| Yeast cell-cycle 4 (replicate 2) | 19      | 0.0856     | 0.0714             | 0.0732                   | 0.0548          | 0.0621       |
| Yeast cell-cycle 5 (replicate 1) | 28      | 0.1084     | 0.1103             | 0.1091                   | 0.0905          | 0.1028       |
| Yeast cell-cycle 5 (replicate 2) | 28      | 0.0913     | 0.1135             | 0.1201                   | 0.0953          | 0.1085       |

| Network (dataset)                | # Nodes | LEM (MCC) | TD-ARACNE (MCC) | Banjo DBN (MCC) |  |  |
|----------------------------------|---------|-----------|-----------------|-----------------|--|--|
| In silico 1                      | 3       | 1.0000    | 0.0000          | -0.5000         |  |  |
| In silico 2                      | 3       | 1.0000    | 0.0000          | -0.5000         |  |  |
| In silico 6                      | 3       | 1.0000    | 0.0000          | 0.3162          |  |  |
| In silico 7                      | 3       | 1.0000    | 0.0000          | 0.3162          |  |  |
| In silico 3                      | 5       | 0.7379    | 0.4528          | -0.0624         |  |  |
| In silico 8                      | 5       | 0.8262    | 0.2956          | 0.0235          |  |  |
| In silico 9                      | 5       | 1.0000    | 0.4001          | 0.1361          |  |  |
| In silico 10                     | 5       | 1.0000    | 0.3932          | -0.1612         |  |  |
| In silico 4                      | 10      | 0.7463    | 0.0636          | 0.0294          |  |  |
| In silico 11                     | 10      | 0.6342    | 0.1732          | -0.0034         |  |  |
| In silico 12                     | 10      | 0.7295    | 0.1382          | -0.0271         |  |  |
| In silico 13                     | 10      | 0.5692    | 0.0636          | 0.0439          |  |  |
| In silico 14                     | 10      | 0.6934    | 0.2089          | 0.0624          |  |  |
| In silico 15                     | 10      | 0.6934    | 0.2293          | 0.0214          |  |  |
| In silico 16                     | 10      | 1.0000    | 0.3041          | 0.1934          |  |  |
| In silico 17                     | 10      | 1.0000    | 0.1860          | 0.0443          |  |  |
| In silico 18                     | 10      | 0.5882    | 0.0647          | 0.0890          |  |  |
| In silico 19                     | 10      | 0.3866    | 0.0392          | -0.0102         |  |  |
| In silico 5                      | 20      | 0.5908    | 0.2147          | 0.0086          |  |  |
| In silico 20                     | 20      | 0.6982    | 0.2207          | 0.0642          |  |  |
| In silico 21                     | 20      | 0.5285    | 0.1225          | 0.0302          |  |  |
| In silico 22                     | 20      | 0.4657    | 0.0524          | -0.0021         |  |  |
| Yeast cell-cycle 1 (replicate 1) | 17      | 0.0478    | 0.0292          | -0.0380         |  |  |
| Yeast cell-cycle 1 (replicate 2) | 17      | -0.0385   | -0.0045         | -0.0145         |  |  |
| Yeast cell-cycle 2 (replicate 1) | 8       | 0.1732    | 0.0000          | -0.0862         |  |  |
| Yeast cell-cycle 2 (replicate 2) | 8       | 0.0976    | 0.1091          | -0.1464         |  |  |
| Yeast cell-cycle 3 (replicate 1) | 10      | 0.2208    | 0.0388          | -0.0032         |  |  |
| Yeast cell-cycle 3 (replicate 2) | 10      | 0.1459    | 0.1175          | -0.0751         |  |  |
| Yeast cell-cycle 4 (replicate 1) | 19      | 0.0422    | 0.0752          | -0.0230         |  |  |
| Yeast cell-cycle 4 (replicate 2) | 19      | -0.0355   | 0.0745          | -0.0033         |  |  |
| Yeast cell-cycle 5 (replicate 1) | 28      | 0.0018    | 0.0307          | -0.0074         |  |  |
| Yeast cell-cycle 5 (replicate 2) | 28      | -0.0100   | 0.0234          | -0.0362         |  |  |
