# Supplementary material for: The Local Edge Machine: inference of dynamic models of gene regulation
Source: PubMed Central journal article supplement (PMC5072315; doi:10.1186/s13059-016-1076-z), 2016-10-19
Supplement: 13059_2016_1076_MOESM6_ESM.pdf [file 13059_2016_1076_MOESM6_ESM.pdf]

| Network (dataset)                | # Nodes | LEM (AUC) | Inferelator (AUC) | Granger Causality (AUC) | Hill-DBN (AUC) | Jump3 (AUC) |
|----------------------------------|---------|-----------|-------------------|-------------------------|----------------|-------------|
| In silico 1                      | 3       | 1.0000    | 1.0000            | 0.7500                  | 0.5000         | 1.0000      |
| In silico 2                      | 3       | 1.0000    | 0.5833            | 0.8889                  | 0.3333         | 0.7778      |
| In silico 6                      | 3       | 1.0000    | 0.8889            | 0.9444                  | 0.5000         | 0.8333      |
| In silico 7                      | 3       | 1.0000    | 0.9444            | 0.8056                  | 0.2222         | 0.9444      |
| In silico 3                      | 5       | 0.9762    | 0.8413            | 0.8333                  | 0.3810         | 0.7143      |
| In silico 8                      | 5       | 0.9683    | 0.6667            | 0.9524                  | 0.3810         | 0.9286      |
| In silico 9                      | 5       | 1.0000    | 0.6900            | 0.6800                  | 0.3900         | 0.6200      |
| In silico 10                     | 5       | 1.0000    | 1.0000            | 0.8200                  | 0.7500         | 0.7100      |
| In silico 4                      | 10      | 0.8559    | 0.5586            | 0.6026                  | 0.5141         | 0.7949      |
| In silico 11                     | 10      | 0.8583    | 0.7179            | 0.6953                  | 0.7016         | 0.8257      |
| In silico 12                     | 10      | 0.8679    | 0.6545            | 0.7764                  | 0.6118         | 0.7608      |
| In silico 13                     | 10      | 0.8103    | 0.6792            | 0.6928                  | 0.5481         | 0.7222      |
| In silico 14                     | 10      | 0.8661    | 0.6812            | 0.6719                  | 0.5074         | 0.8512      |
| In silico 15                     | 10      | 0.8743    | 0.7493            | 0.7470                  | 0.6659         | 0.8006      |
| In silico 16                     | 10      | 1.0000    | 0.6639            | 0.7711                  | 0.7050         | 0.8589      |
| In silico 17                     | 10      | 1.0000    | 0.8778            | 0.7500                  | 0.7756         | 0.9822      |
| In silico 18                     | 10      | 0.8753    | 0.7321            | 0.6899                  | 0.6630         | 0.8086      |
| In silico 19                     | 10      | 0.8339    | 0.6761            | 0.6516                  | 0.5399         | 0.7899      |
| In silico 5                      | 20      | 0.8267    | 0.6854            | 0.7530                  | 0.6834         | 0.7632      |
| In silico 20                     | 20      | 0.8729    | 0.7817            | 0.8352                  | 0.6822         | 0.7942      |
| In silico 21                     | 20      | 0.7598    | 0.6450            | 0.6493                  | 0.5135         | 0.6655      |
| In silico 22                     | 20      | 0.7607    | 0.7008            | 0.7014                  | 0.6434         | 0.7265      |
| Yeast cell-cycle 1 (replicate 1) | 17      | 0.7409    | 0.6793            | 0.6990                  | 0.6318         | 0.6557      |
| Yeast cell-cycle 1 (replicate 2) | 17      | 0.7000    | 0.6674            | 0.6858                  | 0.5251         | 0.5507      |
| Yeast cell-cycle 2 (replicate 1) | 8       | 0.6849    | 0.6810            | 0.6204                  | 0.5065         | 0.6283      |
| Yeast cell-cycle 2 (replicate 2) | 8       | 0.6823    | 0.6960            | 0.6517                  | 0.5521         | 0.5495      |
| Yeast cell-cycle 3 (replicate 1) | 10      | 0.5720    | 0.6206            | 0.6386                  | 0.5087         | 0.6492      |
| Yeast cell-cycle 3 (replicate 2) | 10      | 0.5515    | 0.6546            | 0.6157                  | 0.6594         | 0.5118      |
| Yeast cell-cycle 4 (replicate 1) | 19      | 0.6035    | 0.5832            | 0.6402                  | 0.5619         | 0.6351      |
| Yeast cell-cycle 4 (replicate 2) | 19      | 0.5791    | 0.6335            | 0.6388                  | 0.5501         | 0.5280      |
| Yeast cell-cycle 5 (replicate 1) | 28      | 0.4403    | 0.5019            | 0.5353                  | 0.4345         | 0.5324      |
| Yeast cell-cycle 5 (replicate 2) | 28      | 0.4678    | 0.5517            | 0.5830                  | 0.4621         | 0.5295      |

| Network (dataset)                | # Nodes | LEM (AUPR) | Inferelator (AUPR) | Granger Causality (AUPR) | Hill-DBN (AUPR) | Jump3 (AUPR) |
|----------------------------------|---------|------------|--------------------|--------------------------|-----------------|--------------|
| In silico 1                      | 3       | 0.5000     | 0.8333             | 0.4278                   | 0.3000          | 0.8333       |
| In silico 2                      | 3       | 0.8333     | 0.3972             | 0.6833                   | 0.2472          | 0.4889       |
| In silico 6                      | 3       | 0.5000     | 0.6833             | 0.7361                   | 0.3000          | 0.5444       |
| In silico 7                      | 3       | 0.5000     | 0.7361             | 0.4611                   | 0.2194          | 0.7361       |
| In silico 3                      | 5       | 0.8611     | 0.7849             | 0.5681                   | 0.2322          | 0.4184       |
| In silico 8                      | 5       | 0.7184     | 0.4061             | 0.8327                   | 0.2302          | 0.7564       |
| In silico 9                      | 5       | 0.8000     | 0.4762             | 0.2758                   | 0.1549          | 0.2419       |
| In silico 10                     | 5       | 0.7000     | 0.9000             | 0.3666                   | 0.3044          | 0.2764       |
| In silico 4                      | 10      | 0.4977     | 0.1732             | 0.1865                   | 0.1564          | 0.3797       |
| In silico 11                     | 10      | 0.5302     | 0.4072             | 0.2961                   | 0.2772          | 0.5324       |
| In silico 12                     | 10      | 0.6480     | 0.3374             | 0.5003                   | 0.2262          | 0.5197       |
| In silico 13                     | 10      | 0.4777     | 0.3834             | 0.2937                   | 0.1967          | 0.3123       |
| In silico 14                     | 10      | 0.5334     | 0.4219             | 0.2654                   | 0.1762          | 0.5974       |
| In silico 15                     | 10      | 0.5273     | 0.4282             | 0.3327                   | 0.2382          | 0.4756       |
| In silico 16                     | 10      | 0.7500     | 0.2740             | 0.2783                   | 0.2037          | 0.3372       |
| In silico 17                     | 10      | 0.7500     | 0.4231             | 0.2386                   | 0.2421          | 0.8613       |
| In silico 18                     | 10      | 0.5819     | 0.4711             | 0.3640                   | 0.2713          | 0.5361       |
| In silico 19                     | 10      | 0.3895     | 0.2745             | 0.2360                   | 0.2454          | 0.4033       |
| In silico 5                      | 20      | 0.4602     | 0.1536             | 0.1438                   | 0.1485          | 0.1701       |
| In silico 20                     | 20      | 0.6312     | 0.3599             | 0.2735                   | 0.2029          | 0.2613       |
| In silico 21                     | 20      | 0.4763     | 0.2372             | 0.1634                   | 0.1235          | 0.1317       |
| In silico 22                     | 20      | 0.3155     | 0.1845             | 0.1466                   | 0.1902          | 0.1922       |
| Yeast cell-cycle 1 (replicate 1) | 17      | 0.1659     | 0.1954             | 0.1755                   | 0.1345          | 0.1713       |
| Yeast cell-cycle 1 (replicate 2) | 17      | 0.1398     | 0.1517             | 0.1474                   | 0.0978          | 0.1291       |
| Yeast cell-cycle 2 (replicate 1) | 8       | 0.3350     | 0.3941             | 0.3529                   | 0.3309          | 0.4976       |
| Yeast cell-cycle 2 (replicate 2) | 8       | 0.3456     | 0.4536             | 0.4213                   | 0.3624          | 0.2686       |
| Yeast cell-cycle 3 (replicate 1) | 10      | 0.2480     | 0.3222             | 0.3565                   | 0.2690          | 0.4154       |
| Yeast cell-cycle 3 (replicate 2) | 10      | 0.2451     | 0.4301             | 0.4119                   | 0.4048          | 0.2869       |
| Yeast cell-cycle 4 (replicate 1) | 19      | 0.1191     | 0.1361             | 0.1757                   | 0.1217          | 0.1730       |
| Yeast cell-cycle 4 (replicate 2) | 19      | 0.1051     | 0.1427             | 0.1464                   | 0.1097          | 0.1242       |
| Yeast cell-cycle 5 (replicate 1) | 28      | 0.1579     | 0.1943             | 0.1925                   | 0.1627          | 0.1893       |
| Yeast cell-cycle 5 (replicate 2) | 28      | 0.1553     | 0.2083             | 0.2167                   | 0.1719          | 0.2000       |

| Network (dataset)                | # Nodes | LEM (MCC) | TD-ARACNE (MCC) | Banjo DBN (MCC) |  |  |
|----------------------------------|---------|-----------|-----------------|-----------------|--|--|
| In silico 1                      | 3       | 1.0000    | 0.0000          | -0.7906         |  |  |
| In silico 2                      | 3       | 1.0000    | 0.0000          | -0.7906         |  |  |
| In silico 6                      | 3       | 1.0000    | 0.0000          | 0.5000          |  |  |
| In silico 7                      | 3       | 1.0000    | 0.0000          | 0.5000          |  |  |
| In silico 3                      | 5       | 0.6925    | 0.6999          | -0.0965         |  |  |
| In silico 8                      | 5       | 0.8018    | 0.4568          | 0.0364          |  |  |
| In silico 9                      | 5       | 1.0000    | 0.6001          | 0.2041          |  |  |
| In silico 10                     | 5       | 1.0000    | 0.5898          | -0.2417         |  |  |
| In silico 4                      | 10      | 0.7301    | 0.0935          | 0.0432          |  |  |
| In silico 11                     | 10      | 0.6066    | 0.2572          | -0.0050         |  |  |
| In silico 12                     | 10      | 0.7115    | 0.2059          | -0.0404         |  |  |
| In silico 13                     | 10      | 0.5379    | 0.0948          | 0.0653          |  |  |
| In silico 14                     | 10      | 0.6728    | 0.3091          | 0.0923          |  |  |
| In silico 15                     | 10      | 0.6728    | 0.3393          | 0.0316          |  |  |
| In silico 16                     | 10      | 1.0000    | 0.4419          | 0.2810          |  |  |
| In silico 17                     | 10      | 1.0000    | 0.2703          | 0.0644          |  |  |
| In silico 18                     | 10      | 0.5591    | 0.0961          | 0.1322          |  |  |
| In silico 19                     | 10      | 0.3458    | 0.0576          | -0.0151         |  |  |
| In silico 5                      | 20      | 0.5784    | 0.3091          | 0.0124          |  |  |
| In silico 20                     | 20      | 0.6895    | 0.3177          | 0.0925          |  |  |
| In silico 21                     | 20      | 0.5114    | 0.1771          | 0.0436          |  |  |
| In silico 22                     | 20      | 0.4483    | 0.0757          | -0.0030         |  |  |
| Yeast cell-cycle 1 (replicate 1) | 17      | 0.0062    | 0.0424          | -0.0550         |  |  |
| Yeast cell-cycle 1 (replicate 2) | 17      | -0.0803   | -0.0065         | -0.0211         |  |  |
| Yeast cell-cycle 2 (replicate 1) | 8       | 0.0778    | 0.0000          | -0.1316         |  |  |
| Yeast cell-cycle 2 (replicate 2) | 8       | 0.0000    | 0.1667          | -0.2236         |  |  |
| Yeast cell-cycle 3 (replicate 1) | 10      | 0.1555    | 0.0584          | -0.0049         |  |  |
| Yeast cell-cycle 3 (replicate 2) | 10      | 0.0737    | 0.1768          | -0.1131         |  |  |
| Yeast cell-cycle 4 (replicate 1) | 19      | 0.0048    | 0.1091          | -0.0334         |  |  |
| Yeast cell-cycle 4 (replicate 2) | 19      | -0.0739   | 0.1080          | -0.0048         |  |  |
| Yeast cell-cycle 5 (replicate 1) | 28      | -0.0211   | 0.0483          | -0.0172         |  |  |
| Yeast cell-cycle 5 (replicate 2) | 28      | -0.0126   | 0.0338          | -0.0389         |  |  |
