# Supplementary material for: The Local Edge Machine: inference of dynamic models of gene regulation
Source: PubMed Central journal article supplement (PMC5072315; doi:10.1186/s13059-016-1076-z), 2016-10-19
Supplement: 13059_2016_1076_MOESM13_ESM.pdf [file 13059_2016_1076_MOESM13_ESM.pdf]

| <b><i>In silico 1</i></b> | <b>Has 3 priors</b>  |                  |                  |                  |                  |                  |                  |
|---------------------------|----------------------|------------------|------------------|------------------|------------------|------------------|------------------|
| <b>Noise Level</b>        | <b>No Prior</b>      | <b>1/6 Prior</b> | <b>1/3 Prior</b> | <b>1/2 Prior</b> | <b>2/3 Prior</b> | <b>5/6 Prior</b> | <b>FullPrior</b> |
| 0                         | 1                    | 1                | 1                | 1                | 1                | 1                | 1                |
| 1                         | 1                    | 1                | 1                | 1                | 1                | 1                | 1                |
| 2                         | 1                    | 1                | 1                | 1                | 1                | 1                | 1                |
| 4                         | 1                    | 1                | 1                | 1                | 1                | 1                | 1                |
| 8                         | 1                    | 1                | 1                | 1                | 1                | 1                | 1                |
| 16                        | 1                    | 1                | 1                | 1                | 1                | 1                | 1                |
| 32                        | 1                    | 1                | 1                | 1                | 1                | 1                | 1                |
|                           |                      |                  |                  |                  |                  |                  |                  |
| <b><i>In silico 3</i></b> | <b>Has 5 priors</b>  |                  |                  |                  |                  |                  |                  |
| <b>Noise Level</b>        | <b>No Prior</b>      | <b>1/6 Prior</b> | <b>1/3 Prior</b> | <b>1/2 Prior</b> | <b>2/3 Prior</b> | <b>5/6 Prior</b> | <b>FullPrior</b> |
| 0                         | 0.9900               | 0.9917           | 0.9941           | 0.9942           | 0.9966           | 0.9982           | 1                |
| 1                         | 0.9966               | 0.9973           | 0.9977           | 0.9983           | 0.9990           | 0.9994           | 1                |
| 2                         | 0.9900               | 0.9917           | 0.9922           | 0.9952           | 0.9971           | 0.9978           | 1                |
| 4                         | 0.9933               | 0.9942           | 0.9953           | 0.9969           | 0.9982           | 0.9988           | 1                |
| 8                         | 0.9900               | 0.9915           | 0.9937           | 0.9949           | 0.9967           | 0.9988           | 1                |
| 16                        | 0.9867               | 0.9881           | 0.9909           | 0.9937           | 0.9957           | 0.9980           | 1                |
| 32                        | 0.9933               | 0.9946           | 0.9956           | 0.9964           | 0.9978           | 0.9986           | 1                |
|                           |                      |                  |                  |                  |                  |                  |                  |
| <b><i>In silico 4</i></b> | <b>Has 14 priors</b> |                  |                  |                  |                  |                  |                  |
| <b>Noise Level</b>        | <b>No Prior</b>      | <b>1/6 Prior</b> | <b>1/3 Prior</b> | <b>1/2 Prior</b> | <b>2/3 Prior</b> | <b>5/6 Prior</b> | <b>FullPrior</b> |
| 0                         | 0.8884               | 0.8989           | 0.9102           | 0.9199           | 0.9304           | 0.9399           | 0.9504           |
| 1                         | 0.8880               | 0.8998           | 0.9109           | 0.9218           | 0.9315           | 0.9406           | 0.9516           |
| 2                         | 0.8861               | 0.8969           | 0.9076           | 0.9201           | 0.9312           | 0.9404           | 0.9512           |
| 4                         | 0.8913               | 0.9015           | 0.9098           | 0.9203           | 0.9302           | 0.9397           | 0.9504           |
| 8                         | 0.8365               | 0.8541           | 0.8699           | 0.8872           | 0.9047           | 0.9228           | 0.9372           |
| 16                        | 0.8527               | 0.8684           | 0.8864           | 0.8988           | 0.9159           | 0.9305           | 0.9433           |
| 32                        | 0.8258               | 0.8407           | 0.8585           | 0.8732           | 0.8862           | 0.9025           | 0.9172           |
|                           |                      |                  |                  |                  |                  |                  |                  |
| <b><i>In silico 9</i></b> | <b>Has 5 priors</b>  |                  |                  |                  |                  |                  |                  |
| <b>Noise Level</b>        | <b>No Prior</b>      | <b>1/6 Prior</b> | <b>1/3 Prior</b> | <b>1/2 Prior</b> | <b>2/3 Prior</b> | <b>5/6 Prior</b> | <b>FullPrior</b> |
| 0                         | 1                    | 1                | 1                | 1                | 1                | 1                | 1                |
| 1                         | 1                    | 1                | 1                | 1                | 1                | 1                | 1                |
| 2                         | 1                    | 1                | 1                | 1                | 1                | 1                | 1                |
| 4                         | 1                    | 1                | 1                | 1                | 1                | 1                | 1                |
| 8                         | 0.9866               | 0.9915           | 0.9945           | 0.9958           | 0.9978           | 0.9990           | 1                |
| 16                        | 0.9600               | 0.9726           | 0.9786           | 0.9883           | 0.9936           | 0.9979           | 1                |
| 32                        | 0.9288               | 0.9457           | 0.9555           | 0.9709           | 0.9792           | 0.9872           | 0.9955           |
|                           |                      |                  |                  |                  |                  |                  |                  |

| <i>In silico 19</i> | Has 5 priors |           |           |           |           |           |           |
|---------------------|--------------|-----------|-----------|-----------|-----------|-----------|-----------|
| Noise Level         | No Prior     | 1/6 Prior | 1/3 Prior | 1/2 Prior | 2/3 Prior | 5/6 Prior | FullPrior |
| 0                   | 0.8824       | 0.8943    | 0.9038    | 0.9168    | 0.9241    | 0.9357    | 0.9439    |
| 1                   | 0.8801       | 0.8922    | 0.9049    | 0.9144    | 0.9235    | 0.9344    | 0.9441    |
| 2                   | 0.8911       | 0.8999    | 0.9094    | 0.9184    | 0.9273    | 0.9350    | 0.9425    |
| 4                   | 0.8901       | 0.9002    | 0.9108    | 0.9192    | 0.9291    | 0.9376    | 0.9445    |
| 8                   | 0.8815       | 0.8911    | 0.9002    | 0.9090    | 0.9183    | 0.9280    | 0.9366    |
| 16                  | 0.8475       | 0.8574    | 0.8661    | 0.8724    | 0.8817    | 0.8922    | 0.9005    |
| 32                  | 0.8406       | 0.8507    | 0.8595    | 0.8683    | 0.8794    | 0.8888    | 0.8974    |
