# Supplementary material for: The Local Edge Machine: inference of dynamic models of gene regulation
Source: PubMed Central journal article supplement (PMC5072315; doi:10.1186/s13059-016-1076-z), 2016-10-19
Supplement: 13059_2016_1076_MOESM14_ESM.pdf [file 13059_2016_1076_MOESM14_ESM.pdf]

| <b>Network (dataset)</b>         | <b># Nodes</b> | <b>LEM (AUC)</b>  | <b>Inferelator (AUC)</b>  | <b>Granger Causality (AUC)</b> | <b>Hill-DBN (AUC)</b>  | <b>Jump3 (AUC)</b>  |
|----------------------------------|----------------|-------------------|---------------------------|--------------------------------|------------------------|---------------------|
| Yeast cell-cycle 1 (replicate 1) | 17             | 0.9889            | 0.7710                    | 0.9121                         | 0.9129                 | 0.8740              |
| Yeast cell-cycle 1 (replicate 2) | 17             | 0.9851            | 0.8201                    | 0.9177                         | 0.8874                 | 0.7978              |
| Yeast cell-cycle 2 (replicate 1) | 8              | 0.9682            | 0.7670                    | 0.7955                         | 0.7391                 | 0.7645              |
| Yeast cell-cycle 2 (replicate 2) | 8              | 0.9626            | 0.8047                    | 0.8161                         | 0.7849                 | 0.7486              |
| Yeast cell-cycle 3 (replicate 1) | 10             | 0.8814            | 0.7236                    | 0.8198                         | 0.7666                 | 0.7797              |
| Yeast cell-cycle 3 (replicate 2) | 10             | 0.8779            | 0.7586                    | 0.8035                         | 0.8349                 | 0.7313              |
| Yeast cell-cycle 4 (replicate 1) | 19             | 0.9545            | 0.6912                    | 0.9060                         | 0.8997                 | 0.8277              |
| Yeast cell-cycle 4 (replicate 2) | 19             | 0.9466            | 0.7723                    | 0.9076                         | 0.9007                 | 0.7597              |
| Yeast cell-cycle 5 (replicate 1) | 28             | 0.8235            | 0.5993                    | 0.8293                         | 0.8054                 | 0.7166              |
| Yeast cell-cycle 5 (replicate 2) | 28             | 0.8166            | 0.6436                    | 0.8506                         | 0.8165                 | 0.7221              |
|                                  |                |                   |                           |                                |                        |                     |
| <b>Network (dataset)</b>         | <b># Nodes</b> | <b>LEM (AUPR)</b> | <b>Inferelator (AUPR)</b> | <b>GrangerCausality (AUPR)</b> | <b>Hill-DBN (AUPR)</b> | <b>Jump3 (AUPR)</b> |
| Yeast cell-cycle 1 (replicate 1) | 17             | 0.6749            | 0.3251                    | 0.2869                         | 0.2637                 | 0.2666              |
| Yeast cell-cycle 1 (replicate 2) | 17             | 0.5749            | 0.3105                    | 0.3170                         | 0.2197                 | 0.3157              |
| Yeast cell-cycle 2 (replicate 1) | 8              | 0.7649            | 0.3617                    | 0.3250                         | 0.3028                 | 0.4571              |
| Yeast cell-cycle 2 (replicate 2) | 8              | 0.6513            | 0.4267                    | 0.4049                         | 0.3319                 | 0.2333              |
| Yeast cell-cycle 3 (replicate 1) | 10             | 0.4488            | 0.2999                    | 0.3500                         | 0.2628                 | 0.3843              |
| Yeast cell-cycle 3 (replicate 2) | 10             | 0.4194            | 0.4035                    | 0.4032                         | 0.3890                 | 0.2665              |
| Yeast cell-cycle 4 (replicate 1) | 19             | 0.4900            | 0.2233                    | 0.3093                         | 0.2321                 | 0.2488              |
| Yeast cell-cycle 4 (replicate 2) | 19             | 0.4109            | 0.2592                    | 0.3040                         | 0.2416                 | 0.2376              |
| Yeast cell-cycle 5 (replicate 1) | 28             | 0.2888            | 0.2174                    | 0.2561                         | 0.2294                 | 0.2175              |
| Yeast cell-cycle 5 (replicate 2) | 28             | 0.2456            | 0.2504                    | 0.2959                         | 0.2481                 | 0.2466              |
|                                  |                |                   |                           |                                |                        |                     |
| <b>Network (dataset)</b>         | <b># Nodes</b> | <b>LEM (MCC)</b>  | <b>TD-ARACNE (MCC)</b>    | <b>Banjo (MCC)</b>             |                        |                     |
| Yeast cell-cycle 1 (replicate 1) | 17             | 0.7379            | 0.1375                    | 0.0676                         |                        |                     |
| Yeast cell-cycle 1 (replicate 2) | 17             | 0.5438            | 0.0626                    | 0.1102                         |                        |                     |
| Yeast cell-cycle 2 (replicate 1) | 8              | 0.6831            | 0.0808                    | 0.0605                         |                        |                     |
| Yeast cell-cycle 2 (replicate 2) | 8              | 0.5855            | 0.2857                    | -0.0286                        |                        |                     |
| Yeast cell-cycle 3 (replicate 1) | 10             | 0.4453            | 0.1295                    | 0.1237                         |                        |                     |
| Yeast cell-cycle 3 (replicate 2) | 10             | 0.4453            | 0.2597                    | 0.0336                         |                        |                     |
| Yeast cell-cycle 4 (replicate 1) | 19             | 0.5761            | 0.1950                    | 0.0908                         |                        |                     |
| Yeast cell-cycle 4 (replicate 2) | 19             | 0.4406            | 0.2649                    | 0.1079                         |                        |                     |
| Yeast cell-cycle 5 (replicate 1) | 28             | 0.1845            | 0.1003                    | 0.0775                         |                        |                     |
| Yeast cell-cycle 5 (replicate 2) | 28             | 0.1438            | 0.1289                    | 0.0486                         |                        |                     |
