# Supplementary material for: The Local Edge Machine: inference of dynamic models of gene regulation
Source: PubMed Central journal article supplement (PMC5072315; doi:10.1186/s13059-016-1076-z), 2016-10-19
Supplement: 13059_2016_1076_MOESM15_ESM.pdf [file 13059_2016_1076_MOESM15_ESM.pdf]

| <b>Network (dataset)</b>         | <b># Priors</b> | <b>No Prior</b> | <b>1/6 Prior</b> | <b>1/3 Prior</b> | <b>1/2 Prior</b> | <b>2/3 Prior</b> | <b>5/6 Prior</b> | <b>Full Prior</b> |
|----------------------------------|-----------------|-----------------|------------------|------------------|------------------|------------------|------------------|-------------------|
| Yeast cell-cycle 1 (replicate 1) | 25              | 0.8693          | 0.8888           | 0.9108           | 0.9331           | 0.9519           | 0.9733           | 0.9889            |
| Yeast cell-cycle 1 (replicate 2) | 25              | 0.8465          | 0.8695           | 0.8927           | 0.9163           | 0.9402           | 0.9629           | 0.9854            |
| Yeast cell-cycle 2 (replicate 1) | 7               | 0.8460          | 0.8693           | 0.8902           | 0.9100           | 0.9339           | 0.9504           | 0.9682            |
| Yeast cell-cycle 2 (replicate 2) | 7               | 0.8404          | 0.8646           | 0.8841           | 0.9055           | 0.9260           | 0.9441           | 0.9626            |
| Yeast cell-cycle 3 (replicate 1) | 9               | 0.7092          | 0.7388           | 0.7662           | 0.7985           | 0.8264           | 0.8534           | 0.8832            |
| Yeast cell-cycle 3 (replicate 2) | 9               | 0.6957          | 0.7246           | 0.7580           | 0.7866           | 0.8181           | 0.8487           | 0.8776            |
| Yeast cell-cycle 4 (replicate 1) | 27              | 0.7409          | 0.7771           | 0.8120           | 0.8480           | 0.8843           | 0.9204           | 0.9544            |
| Yeast cell-cycle 4 (replicate 2) | 27              | 0.7208          | 0.7589           | 0.7959           | 0.8334           | 0.8724           | 0.9101           | 0.9464            |
| Yeast cell-cycle 5 (replicate 1) | 32              | 0.5138          | 0.5664           | 0.6179           | 0.6693           | 0.7196           | 0.7724           | 0.8236            |
| Yeast cell-cycle 5 (replicate 2) | 32              | 0.4804          | 0.5369           | 0.5915           | 0.6486           | 0.7036           | 0.7596           | 0.8166            |
