# Supplementary material for: The Local Edge Machine: inference of dynamic models of gene regulation
Source: PubMed Central journal article supplement (PMC5072315; doi:10.1186/s13059-016-1076-z), 2016-10-19
Supplement: 13059_2016_1076_MOESM18_ESM.pdf [file 13059_2016_1076_MOESM18_ESM.pdf]

| Gene Name       | Period Change (h) | P-value | Individual siRNAs with phenotype |
|-----------------|-------------------|---------|----------------------------------|
| <b>Controls</b> |                   |         |                                  |
| Bmal1           | AR                |         | 4/4                              |
| Cry1            | AR                |         | 4/4                              |
| Cry2            | +3.95 ± 0.46      | <0.001  | 4/4                              |
| <b>Targets</b>  |                   |         |                                  |
| Ankrd23         | AR                |         | 3/4                              |
| Cml5            | +1.19 ± 0.09      | 0.010   | 4/4                              |
| Fus             | -0.36 ± 0.66      | 0.148   |                                  |
| Gnl3            | -0.35 ± 0.18      | 0.141   |                                  |
| Mgrn1           | +0.66 ± 0.49      | 0.110   |                                  |
| Nup62           | +1.76 ± 0.44      | 0.004   | 3/4                              |
| P2ry1           | +1.37 ± 0.21      | 0.027   | 1/2                              |
| Peg3            | +0.56 ± 0.43      | 0.128   |                                  |
| Tsc22d2         | +1.72 ± 0.31      | 0.002   | 2/2                              |
| Tsc22d3         | +0.32 ± 0.19      | 0.177   |                                  |
