# Supplementary material for: The Local Edge Machine: inference of dynamic models of gene regulation
Source: PubMed Central journal article supplement (PMC5072315; doi:10.1186/s13059-016-1076-z), 2016-10-19
Supplement: 13059_2016_1076_MOESM19_ESM.pdf [file 13059_2016_1076_MOESM19_ESM.pdf]

|         | <b>p-val</b> | <b>BHq val</b> |
|---------|--------------|----------------|
| Neg.si  | 1.000        | 1.000          |
| Ankrd23 | NA           | NA             |
| Cml5    | 0.010        | 0.033          |
| Fus     | 0.148        | 0.230          |
| Gnl3    | 0.172        | 0.230          |
| Mgrn1   | 0.110        | 0.230          |
| Nup62   | 0.004        | 0.019          |
| P2ry1   | 0.027        | 0.071          |
| Peg3    | 0.128        | 0.230          |
| Tsc22d2 | 0.002        | 0.013          |
| Tsc22d3 | 0.177        | 0.230          |
| Cry2    | 0.000        | 0.003          |

\*\*Arrhythmic (AR)
