# Supplementary material for: The Local Edge Machine: inference of dynamic models of gene regulation
Source: PubMed Central journal article supplement (PMC5072315; doi:10.1186/s13059-016-1076-z), 2016-10-19

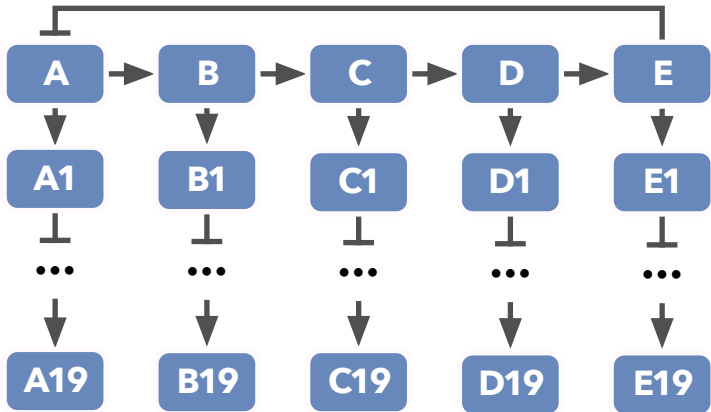

Supplement: 13059_2016_1076_MOESM23_ESM.pdf [file 13059_2016_1076_MOESM23_ESM.pdf]
