# Supplementary material for: The Local Edge Machine: inference of dynamic models of gene regulation
Source: PubMed Central journal article supplement (PMC5072315; doi:10.1186/s13059-016-1076-z), 2016-10-19
Supplement: 13059_2016_1076_MOESM24_ESM.pdf [file 13059_2016_1076_MOESM24_ESM.pdf]

|                                     |                |                   |                           |                                 |                        |                     |
|-------------------------------------|----------------|-------------------|---------------------------|---------------------------------|------------------------|---------------------|
| <b>Signed edge inference task</b>   |                |                   |                           |                                 |                        |                     |
| <b>Network</b>                      | <b># Nodes</b> | <b>LEM (AUC)</b>  | <b>Inferelator (AUC)</b>  | <b>Granger Causality (AUC)</b>  | <b>Hill-DBN (AUC)</b>  | <b>Jump3 (AUC)</b>  |
| In silico 23                        | 100            | 1.0000            | 0.9878                    | 0.9924                          | 0.9874                 | 0.9975              |
| In silico 24                        | 100            | 0.9707            | 0.8250                    | 0.8396                          | 0.7950                 | 0.5896              |
| <b>Signed edge inference task</b>   |                |                   |                           |                                 |                        |                     |
| <b>Network</b>                      | <b># Nodes</b> | <b>LEM (AUPR)</b> | <b>Inferelator (AUPR)</b> | <b>Granger Causality (AUPR)</b> | <b>Hill-DBN (AUPR)</b> | <b>Jump3 (AUPR)</b> |
| In silico 23                        | 100            | 0.5049            | 0.1361                    | 0.1271                          | 0.2426                 | 0.4974              |
| In silico 24                        | 100            | 0.2710            | 0.0467                    | 0.0287                          | 0.0301                 | 0.0142              |
| <b>Unsigned edge inference task</b> |                |                   |                           |                                 |                        |                     |
| <b>Network</b>                      | <b># Nodes</b> | <b>LEM (AUC)</b>  | <b>Inferelator (AUC)</b>  | <b>Granger Causality (AUC)</b>  | <b>Hill-DBN (AUC)</b>  | <b>Jump3 (AUC)</b>  |
| In silico 23                        | 100            | 1.0000            | 0.9903                    | 0.9949                          | 0.9898                 | 1.0000              |
| In silico 24                        | 100            | 0.9422            | 0.8266                    | 0.8414                          | 0.7964                 | 0.5901              |
| <b>Unsigned edge inference task</b> |                |                   |                           |                                 |                        |                     |
| <b>Network</b>                      | <b># Nodes</b> | <b>LEM (AUPR)</b> | <b>Inferelator (AUPR)</b> | <b>Granger Causality (AUPR)</b> | <b>Hill-DBN (AUPR)</b> | <b>Jump3 (AUPR)</b> |
| In silico 23                        | 100            | 0.5049            | 0.2723                    | 0.2542                          | 0.4852                 | 0.9948              |
| In silico 24                        | 100            | 0.2711            | 0.0934                    | 0.0574                          | 0.0602                 | 0.0285              |
