# Supplementary material for: The Local Edge Machine: inference of dynamic models of gene regulation
Source: PubMed Central journal article supplement (PMC5072315; doi:10.1186/s13059-016-1076-z), 2016-10-19
Supplement: 13059_2016_1076_MOESM25_ESM.pdf [file 13059_2016_1076_MOESM25_ESM.pdf]

| <b>Signed edge inference task</b>   |                |                  |                        |                        |
|-------------------------------------|----------------|------------------|------------------------|------------------------|
| <b>Network</b>                      | <b># Nodes</b> | <b>LEM (MCC)</b> | <b>TD-ARACNE (MCC)</b> | <b>Banjo DBN (MCC)</b> |
| In silico 23                        | 100            | 0.9950           | 0.0001                 | -0.0072                |
| In silico 24                        | 100            | 0.3930           | 0.0750                 | 0.0308                 |
|                                     |                |                  |                        |                        |
| <b>Unsigned edge inference task</b> |                |                  |                        |                        |
| <b>Network</b>                      | <b># Nodes</b> | <b>LEM (MCC)</b> | <b>TD-ARACNE (MCC)</b> | <b>Banjo DBN (MCC)</b> |
| In silico 23                        | 100            | 0.9949           | 0.0002                 | -0.0102                |
| In silico 24                        | 100            | 0.3899           | 0.1064                 | 0.0437                 |
