# Supplementary material for: The Local Edge Machine: inference of dynamic models of gene regulation
Source: PubMed Central journal article supplement (PMC5072315; doi:10.1186/s13059-016-1076-z), 2016-10-19
Supplement: 13059_2016_1076_MOESM26_ESM.pdf [file 13059_2016_1076_MOESM26_ESM.pdf]

| <b>Network</b> | <b># Nodes</b> | <b>Mazur <i>et al.</i> run time (secs)</b> | <b>LEM run time (secs)</b> |
|----------------|----------------|--------------------------------------------|----------------------------|
| In silico 1    | 3              | 38813.20                                   | 402.25                     |
| In silico 2    | 3              | 35610.86                                   | 505.87                     |
| In silico 6    | 3              | 38635.03                                   | 456.09                     |
| In silico 7    | 3              | 37566.28                                   | 333.58                     |
